# Supplementary material for: Fast drosophila enterocyte regrowth after infection involves a reverse metabolic flux driven by an amino acid transporter
Source: PubMed Central journal article supplement (PMC10448536; doi:10.1016/j.isci.2023.107490), 2023-07-27
Supplement: mmc1.pdf [file mmc1.pdf]

iScience, Volume 26

## Supplemental information

**Fast *drosophila* enterocyte regrowth  
after infection involves a reverse metabolic  
flux driven by an amino acid transporter**

**Catherine Socha, Inês S. Pais, Kwang-Zin Lee, Jiyong Liu, Samuel Liégeois, Matthieu Lestradet, and Dominique Ferrandon**

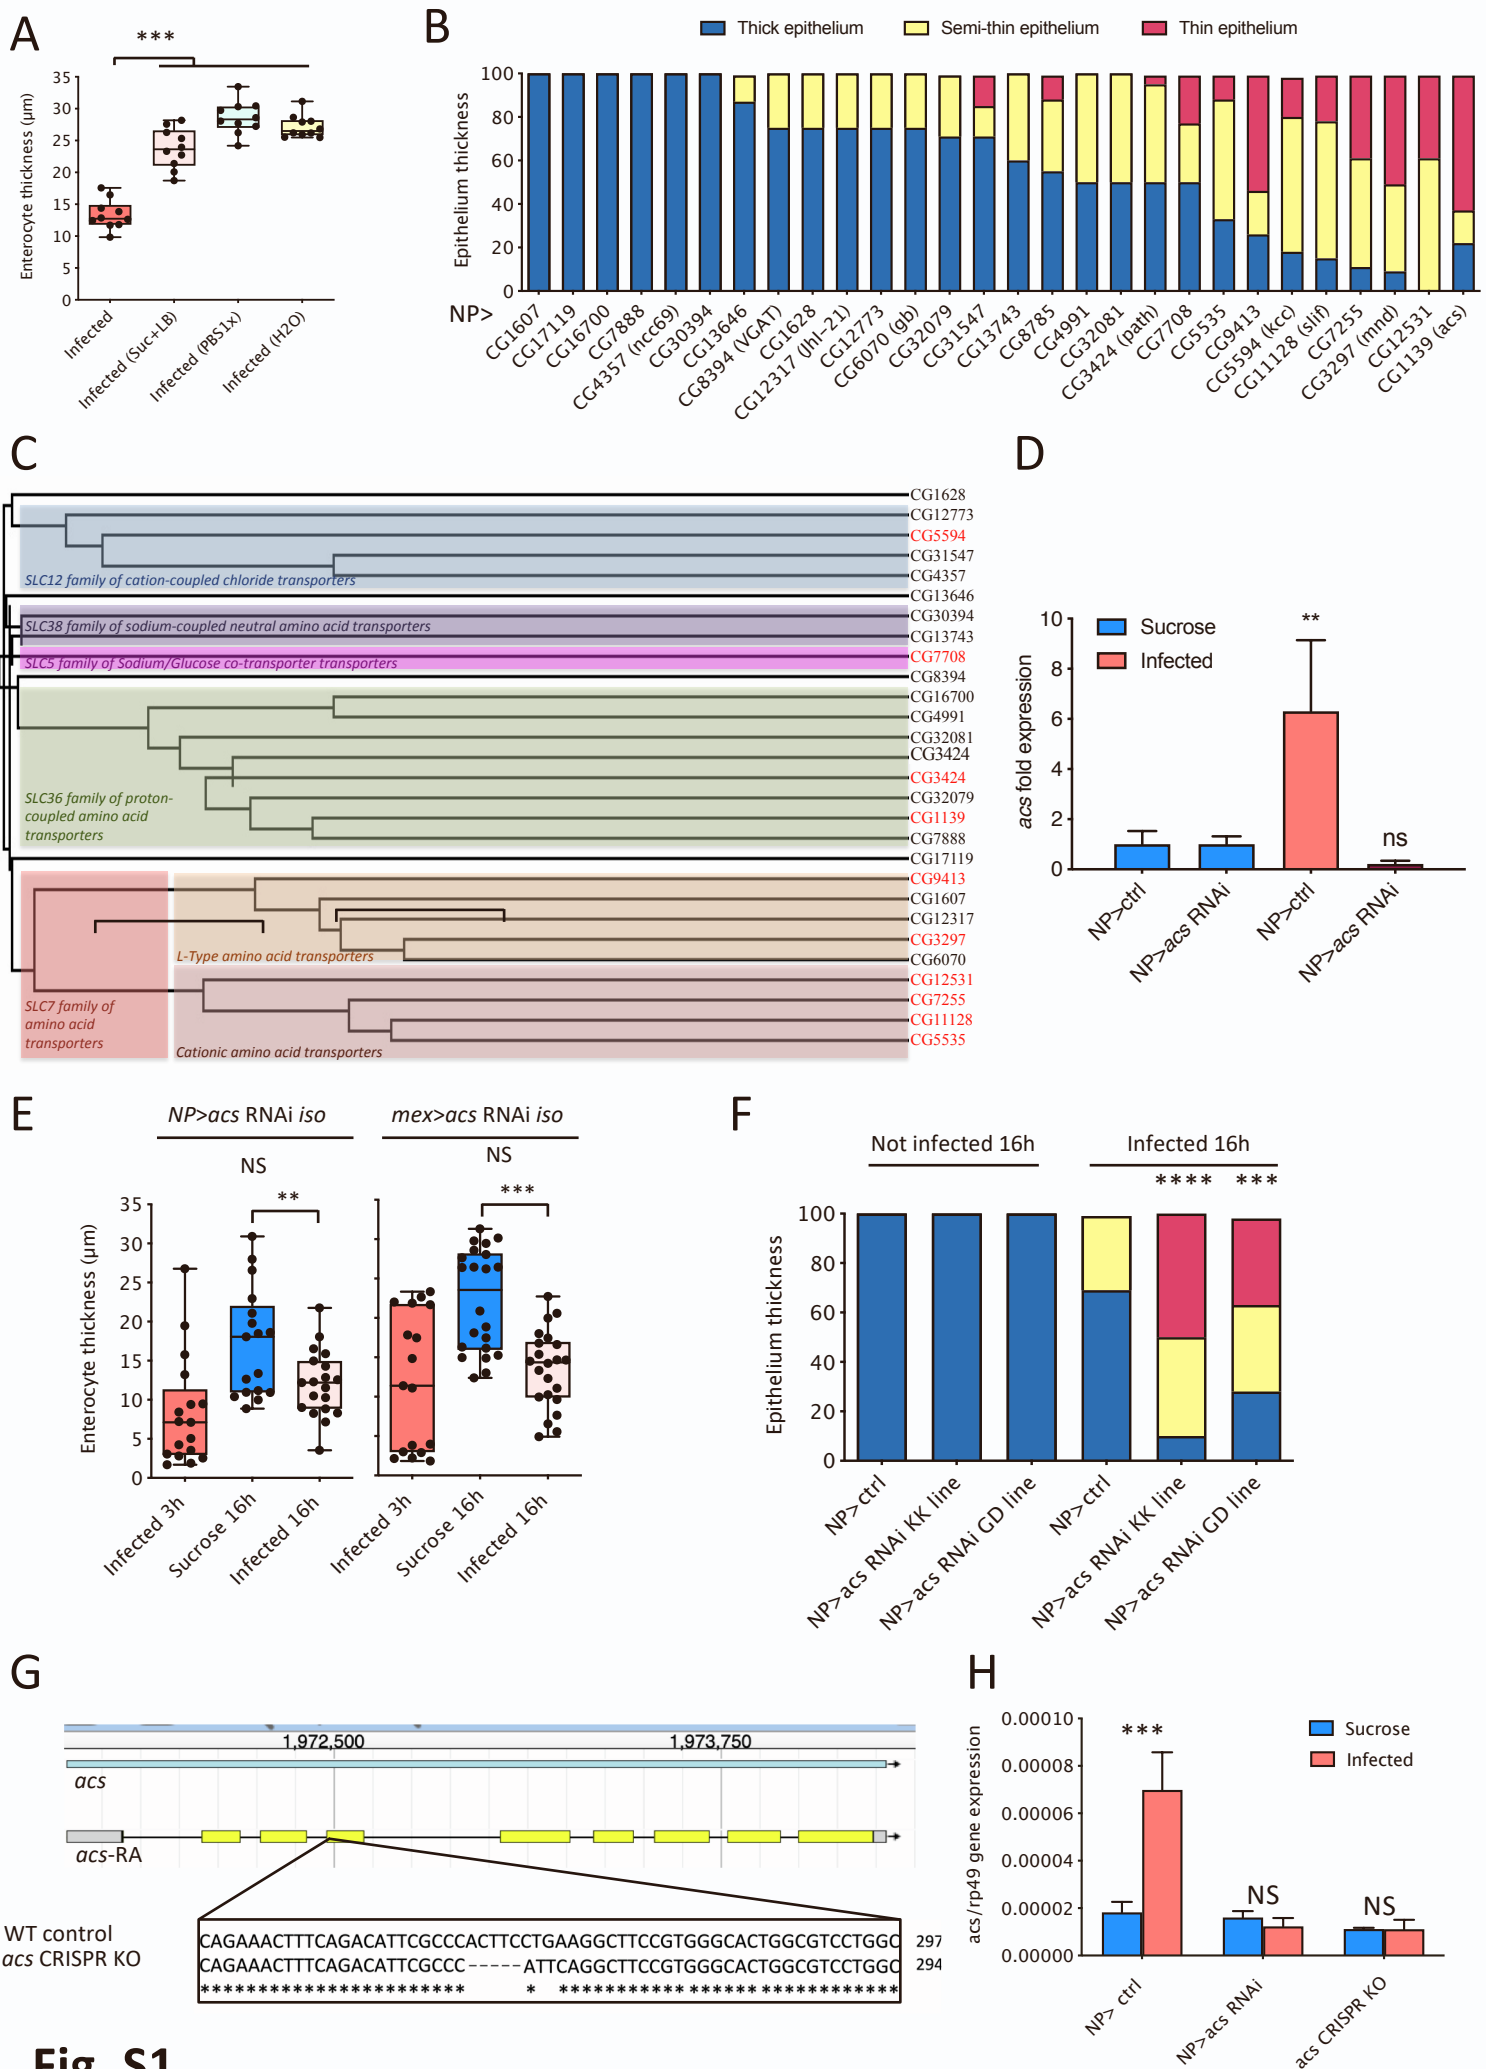

Fig. S1

**Supplementary Figure 1. Amino acid transporters involved in the fast recovery of the gut epithelium after *SmDb11* infection. Related to Figures 1&2**

(A) Epithelial thickness quantification of an independent repeat of the experiment displayed in Fig. 1B. (*lm*, \*\*\* =  $p < 0.001$ ). (B) % epithelium thickness categories were assessed 16h after *SmDb11* infection in flies that were knocked down for the different amino acid transporters in the gut enterocytes (with *NP>* driver). (C) Phylogenetic tree based on protein sequence from the different amino acid transporters used to screen in (B). Phylogenetic tree generated using UniProt. In red are shown the amino acid transporters that are required to contribute to gut recovery in (B). (D) Efficiency of *acs* knockdown in the *NP> acs*-RNAi KK line from VDRC. *acs* expression was measured by RT-qPCR on 10 dissected midguts, in triplicates. Expression was determined relative to sucrose controls. *acs* was induced in the midgut during the recovery, 9h post-infection in control but not *NP> acs*-RNAi flies (one-way ANOVA, \*\*= $p < 0.01$ ). (E) Control *NP> acs* RNAi *iso* and *mex>acs* RNAi *iso* flies were exposed to sucrose or *SmDb11* and enterocytes thickness was measured with ImageJ. Each dot represents the average of 10 enterocytes in one midgut. The middle bar of box plots represent the median and the upper and lower limits of the boxes indicate, respectively, the first and third quartile; the whiskers define the minima and maxima (*lmer*, \*\* =  $p < 0.01$ ; \*\*\* =  $p < 0.001$ ,  $n=7-9$  midguts). (F) % epithelium thickness categories were assessed 16h after *SmDb11* infection or sucrose exposure (non-infected) in *NP>ctrl*, *NP> acs*-RNAi KK line and *NP> acs*-RNAi GD line. (chi-square, comparing with control, \*\*\*= $p < 0.001$ , \*\*\*\*= $p < 0.0001$ ) (G) Representative map of the gene *acs* with respective exons in yellow, taken from Flybase. CRISPR knock-out mutant for *acs* comprises a deletion of 5bp in the sequence, causing a frame-shift mutation with a non-functional truncated protein. (H) *acs* expression level in control flies, *NP> acs* RNAi or in the CRISPR KO mutant 9 h post infection. Gene expression was measured by RT-qPCR on 5 dissected midguts, in triplicates. Expression of *acs* increases in control flies but not in *NP> acs* RNAi or in the CRISPR KO mutant (*lmer*, \*\*\* =  $p < 0.001$ ).

D, H: Bars represent the mean and the error bars display Standard Deviation of the data.

**A**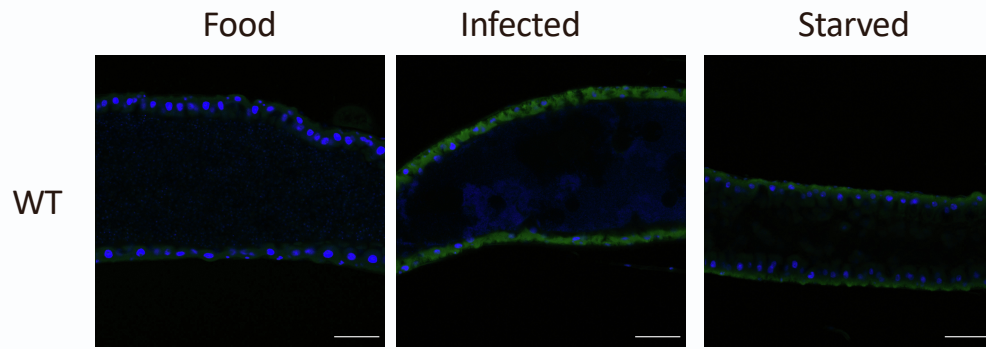**B**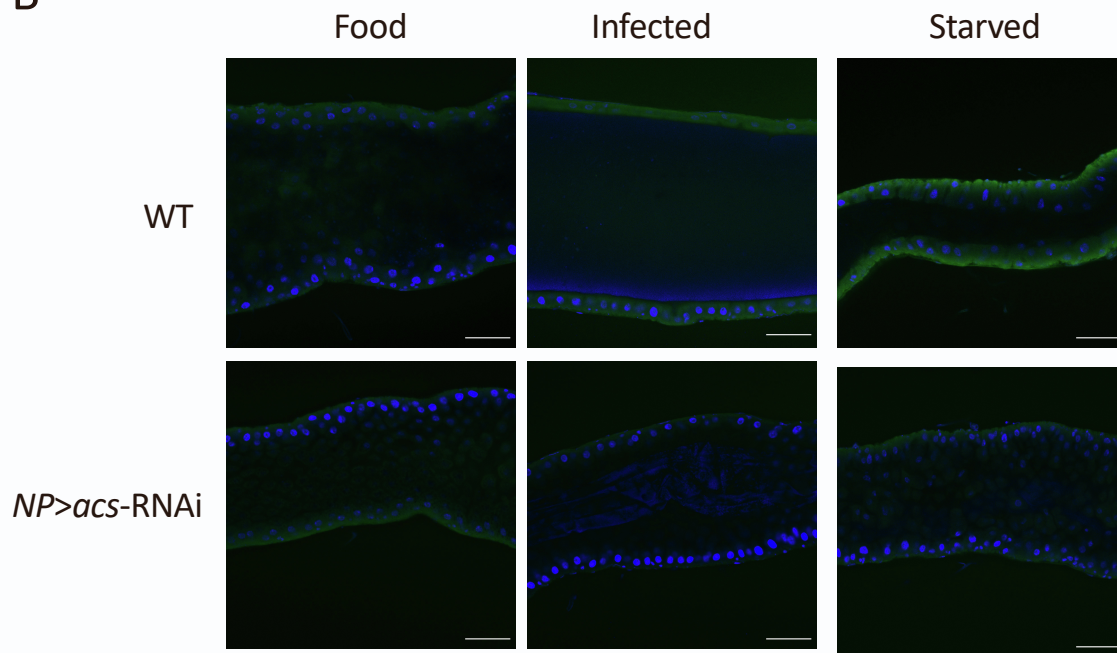**Fig. S2**



**Supplementary Figure 2. *acs*-dependent uptake in the intestinal epithelium of an injected methionine analogue upon *SmDb11* exposure or starvation. Related to Figures 1&4**

**(A-B)** Flies were injected with 50  $\mu$ M AHA and exposed to regular food, *SmDb11* (infected), sucrose or water (starved). Midguts were dissected 6h later and fluorescence from the incorporated amino-acid was assessed by staining with an alkyne probe. No uptake was observed in the *acs*-silenced midguts (B). Quantification is found respectively in Fig. 1G (A) and Fig. 4C (B). Note that the signal appears to be concentrated in the basal side of enterocytes, where ACS is also located, and possibly other amino-acid transporters, Scale bars are 100  $\mu$ m.

**A**

Injection strain: *w<sup>[1118]</sup>*

Genome Editing:

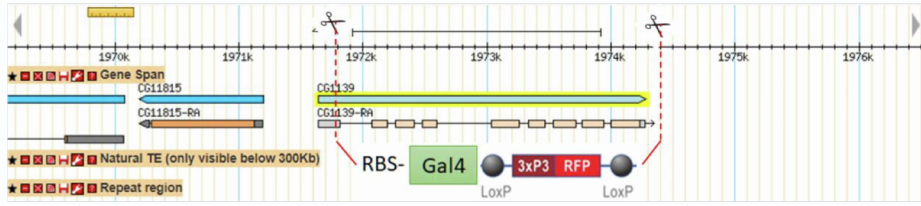

- (1) The entire CDS region of *CG1139* will be deleted and replaced by cassette Gal4-RFP.
- (2) Cassette Gal4-RFP contains ribosome binding sequence (RBS), Gal4, SV40 polyA terminator, and floxed 3XP3-RFP as a selection marker.
- (3) The selection marker 3XP3-RFP contains loxP site, 3X Pax3 promoter, RFP, alpha-Tubulin 3'UTR and loxP site. It facilitates the genetic screening and can be flipped out by Cre recombinase.

**B**

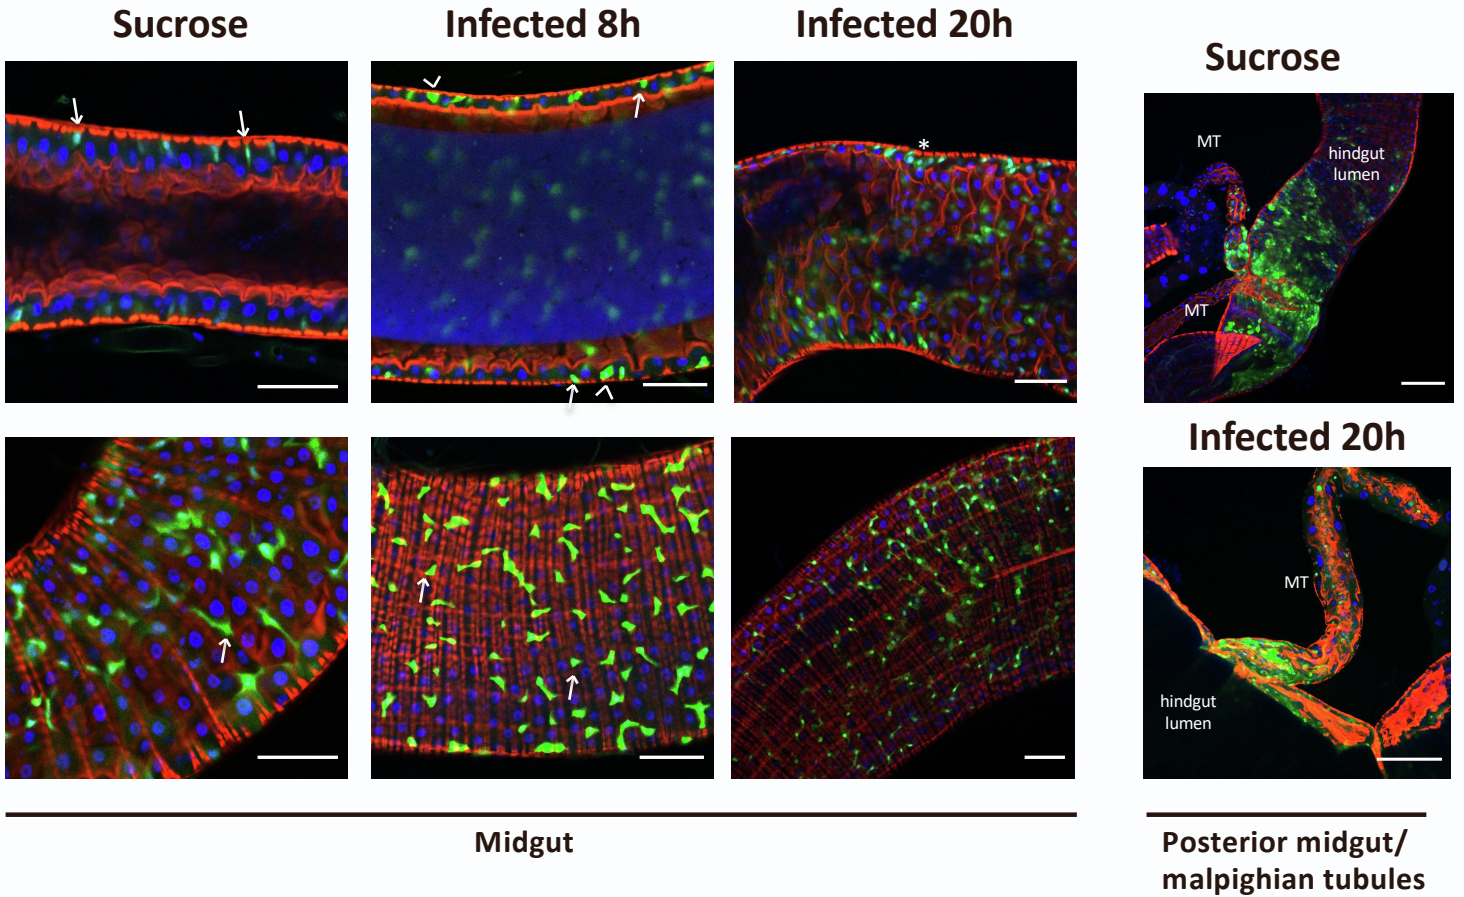

**C**

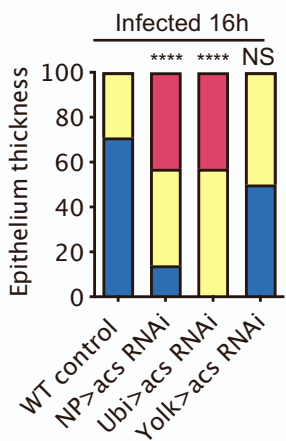

**D**

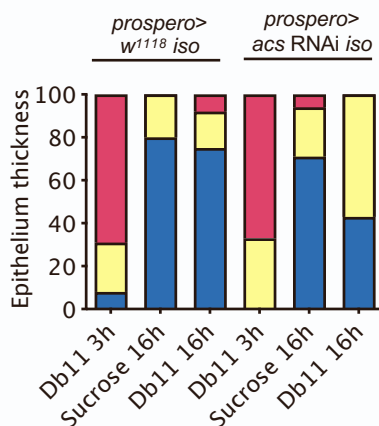

**E**

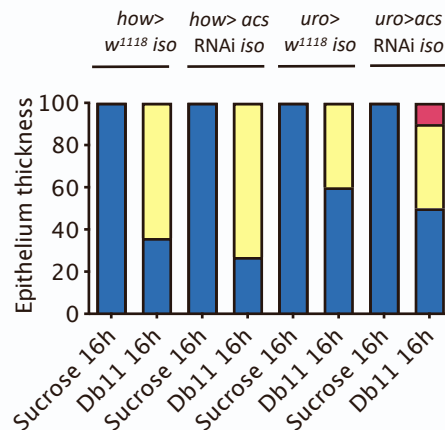

**Fig. S3**

**Supplementary Figure 3. Function of ACS in other host tissues and cell types. Related to Figure 3**

(A) Scheme for the Knock-in CRISPR mutant generated for *CG1139/acs* (*acs* KI CRISPR mutant). The entire coding sequence of *CG1139/acs* was deleted and replaced by a Gal4 cassette. (B) *acs* KI CRISPR mutant flies were crossed with UAS-GFP flies and the progeny was exposed to sucrose or infected with *SmDb11* for 8h and 20h. Cells expressing *acs* are GFP positive cells (green). Blue = DAPI; Red = Actin. Expression of *acs* is present in progenitor cells that resemble ISCs (arrows) and enteroblasts (arrowheads) after sucrose exposure and also after infection (scale for midguts, 50 $\mu$ m). Expression of *acs* is also observed in some enterocytes (star). *acs* is also expressed in Malpighian tubules (MT) and posterior midgut, either in sucrose and infection conditions (scale for posterior midgut and Malpighian tubules, 100 $\mu$ m). n=8-10 guts per condition, 2 independent experimental replicates. C-E: Qualitative quantification of intestines in categories according to their epithelial thickness: Thin-red, Semithin-yellow, Thick-blue (n=24-30). (C) *acs* was knocked down in enterocytes (*NP>acs* RNAi), whole body (*ubi>acs* RNAi) and in the fat body (*yolk>acs* RNAi). Flies were infected with *SmDb11* and the % thickness categories of gut epithelium was assessed 16h post infection. Knocking down *acs* in whole body and in the enterocytes delays the recovery to the thick gut epithelium. (chi-square, comparing with control, \*\*\*\*= $p < 0.0001$ ) (D) *acs* was knocked down in enteroendocrine cells (*prospero>acs* RNAi iso). Flies were infected with *SmDb11* or exposed to sucrose and % thickness categories of gut epithelium was assessed 3h and 16h post infection. (E) *acs* was knocked down in the visceral muscle (*how>acs* RNAi iso) and in the Malpighian tubules (*uro>acs* RNAi iso). Flies were infected with *SmDb11* or exposed to sucrose and the % thickness categories of gut epithelium was assessed 16h post infection.

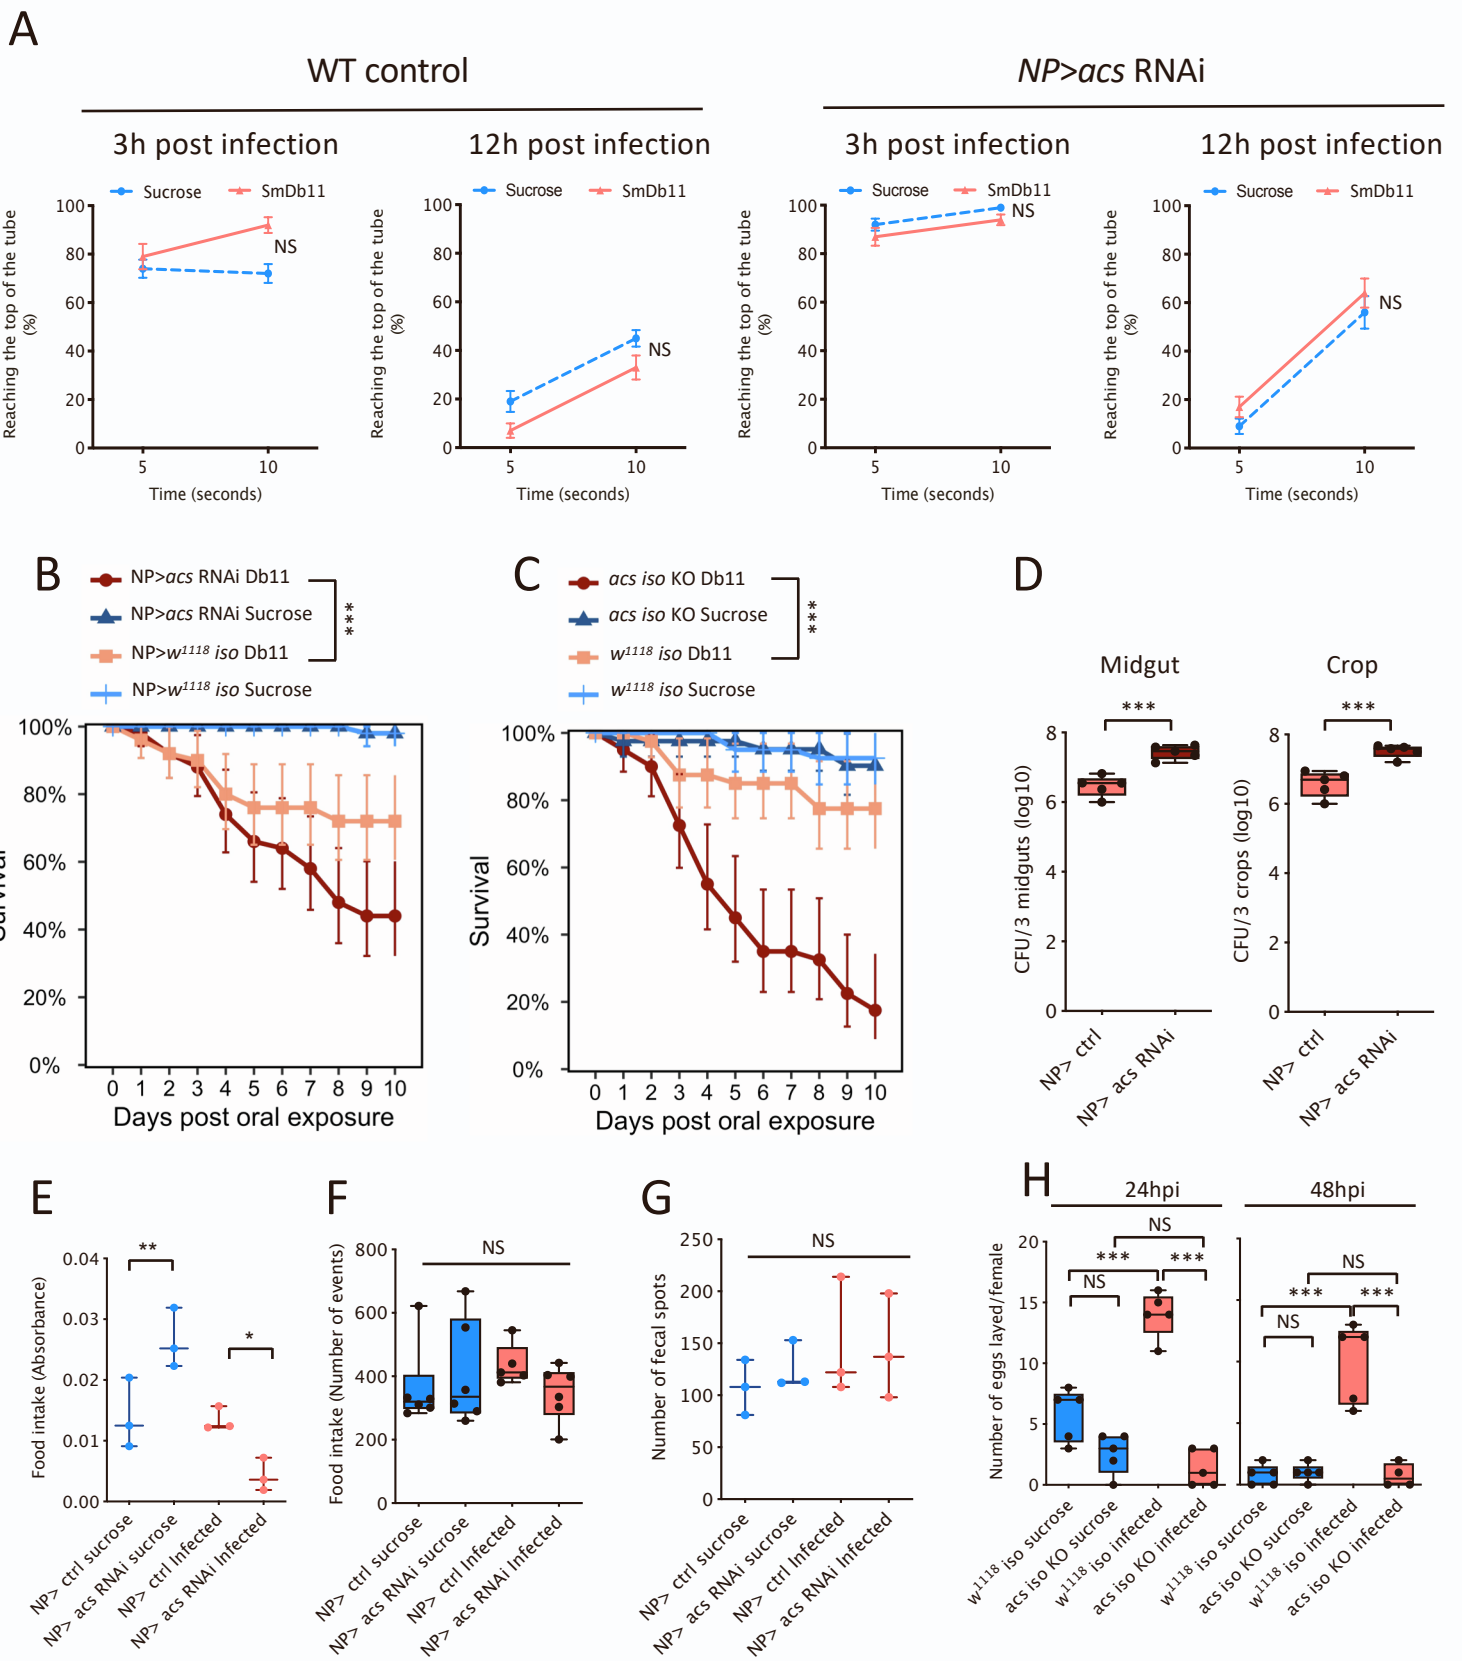

**Fig. S4**

**Supplementary Figure 4. *acs* is required for increased fitness upon infection. Related to Figure 4**

(A) Fly locomotion assessed by Negative Geotaxis Assay in control and *NP>acs* RNAi flies. Flies were either exposed to sucrose or infected with *SmDb11* and the assay was performed 3h and 16h post-infection. There are no significant differences between control and *NP>acs* RNAi flies. Error bars display Standard Deviation of the data (one-way ANOVA, n=20, 2 independent experiments). (B-C) Survival of *NP>ctrl* and *NP>acs* -RNAi (B) or *w<sup>1118</sup> iso* and *acs iso* CRISPR KO flies (C) during chronic infection with *SmDb11* OD=1 or exposed to sucrose 50mM. *NP>acs* RNAi and *acs iso* CRISPR KO flies present higher mortality after infection compared to their respective wild-type controls. Error bars display Standard Deviation of the data (*lmer*, \*\*\*= $p$ -value<0.001). (D) Bacterial loads 16h after *SmDb11* infection in *NP>ctrl* or *NP>acs* -RNAi. Each sample (each dot) corresponds to a pool of three midguts or three crops. *NP>acs* RNAi have higher bacterial loads in the midgut and crop compared to control flies (*lmer*, \*\*\*= $p$ <0.001). (E) *NP>ctrl* and *NP>acs* RNAi flies were either infected or exposed to sucrose in a solution containing blue dye for 16h. Flies were collected, and food intake was analyzed by measuring the absorbance of ingested blue dye (*lm*, \*= $p$ <0.01, \*\*= $p$ <0.001, 1 experimental replicate) (F) *NP>ctrl* and *NP>acs* RNAi flies were infected or exposed to sucrose using the FLIC system for 16h and number of events was quantified (*lmer*, NS= $p$ >0.05) (G) *NP>ctrl* and *NP>acs* RNAi flies were either infected or exposed to sucrose in a solution containing blue dye for 16h. Fecal spots were counted on the side of the vials. There are no significant differences between the fly lines (*lm*,  $p$ >0.05, n=3 tubes with 10 flies, 1 experimental replicate). (H) *w<sup>1118</sup> iso* and *acs iso* CRISPR KO flies were exposed for 16h to *SmDb11* OD=10. Afterwards, single females with two males were placed in individual vials (n=5 vials) for 24h and transferred to new vials after that period for another 24h. The number of eggs in each vial was counted thus yielding data for egg laying 24h and 48h after moving the flies back to regular fly food (*lmer*, \*\*\*= $p$ <0.001).

For D, F, H, the middle bar of box plots represents the median and the upper and lower limits of the boxes indicate, respectively, the first and third quartile; the whiskers define the minima and maxima. For E and G, the median bars represent the mean while the error bars display Standard Deviation of the data.



**A**

*NP>ctrl* 16h after *Db11* infection

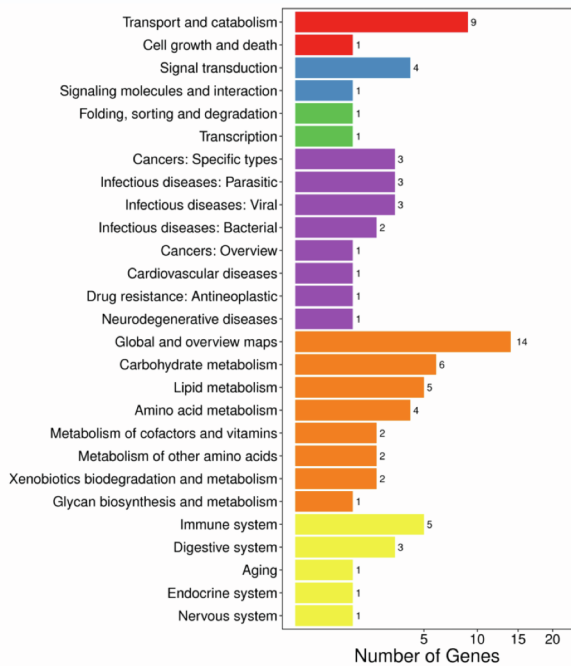

*NP>acs* RNAi 16h after *Db11* infection

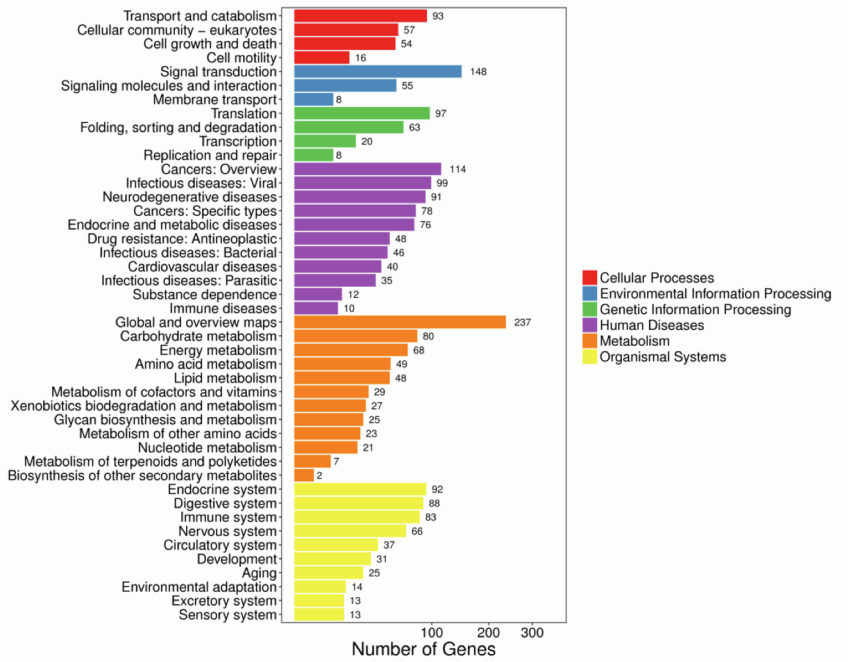

**B**

Hierarchical clustering of differentially expressed genes after *Db11* infection

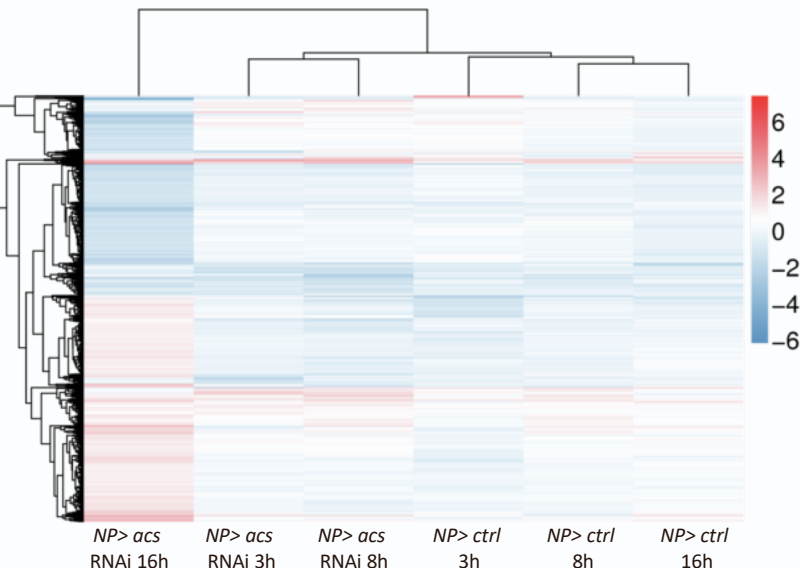

**C**

Gene sets positively enriched in the control and not in *NP>acs* RNAi at 8h

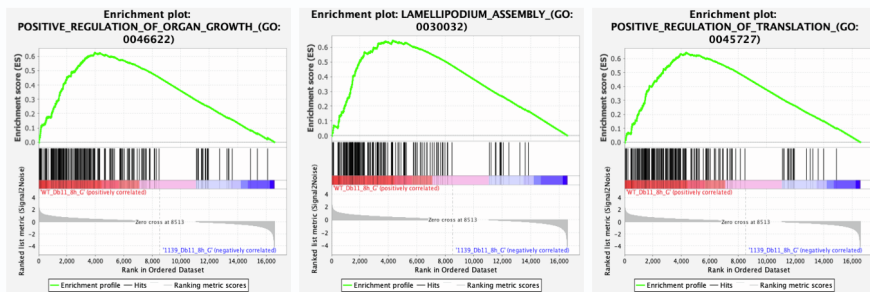

**D**

Gene sets positively enriched in the control and not in *NP>acs* RNAi at 16h

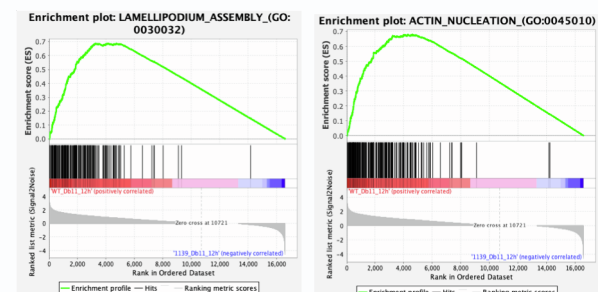

**E**

Growth-related genes differentially expressed in *NP>acs* RNAi (Infected/Sucrose)

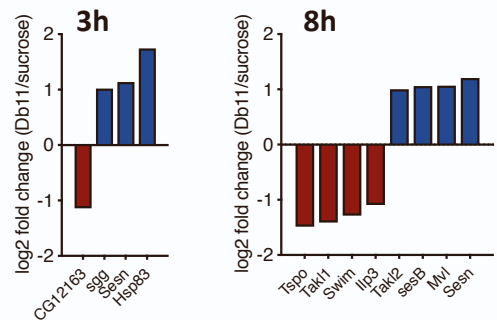

**F**

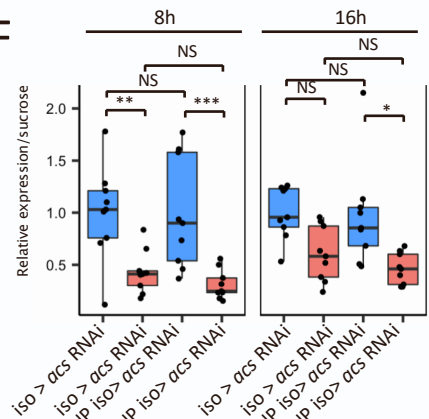

**Fig. S5**

**Supplementary Figure 5. Genes differentially expressed between NP>acs RNAi and control flies after infection. Related to figure 6**

(A) KEGG pathway enrichment analysis for the RNA sequencing performed on guts from NP>ctrl and NP>acs-RNAi flies, at 16h post *Db11* infection compared with respective sucrose controls. The fact that the NP>ctrl samples were generally more spread out than the NP>acs RNAi samples, especially those corresponding to wild-type flies fed on sucrose (Fig. 6A) may limit the power of the KEGG pathway analysis in NP>ctrl flies, as reflected by the low number of genes revealed in this panel. (B) Hierarchical clustering of genes differently expressed at 3h, 8h and 16h post *SmDb11* infection, relative to the correspondent sucrose control. Red correspond to up-regulated genes and blue to down-regulated genes. (C, D) Gene set enrichment analysis was performed on the RNA sequencing results to compare enriched gene sets between NP> ctrl and NP>acs RNAi. (C) Genes involved in positive regulation of growth, lamellipodium formation and positive regulation of translation are positively enriched at 8h post infection in NP> ctrl and not in NP>acs RNAi; see also Supplementary tables 1-3. (D) At 16h post infection, there is an enrichment of genes involved in lamellipodium formation, actin nucleation and negative regulation of growth in the NP> ctrl and not in NP>acs RNAi (see also Supplementary tables 4-5). (E) Genes involved in growth that are up- or down-regulated in *acs* RNAi 3h and 8h after infection (relative to sucrose). (F) Expression of *Myc* was measured by RT-qPCR in dissected midguts of NPiso>acs RNAi and *w<sup>1118</sup> iso>acs* RNAi flies 8h and 16h post infection. *Myc* steady-state transcripts are down-regulated at 8h in both flies but at 16h are only down-regulated in NPiso>acs RNAi and not significantly different in control flies. The middle bar of box plots represent the median and the upper and lower limits of the boxes indicate, respectively, the first and third quartile; the whiskers define the minima and maxima (*lmer*, \*= $p < 0.05$ , \*\*= $p < 0.01$ , \*\*\*= $p < 0.001$ , data shown is pooled from 3 independent experiments); blue: flies fed on sucrose, red: flies fed on *SmDb11* solution.

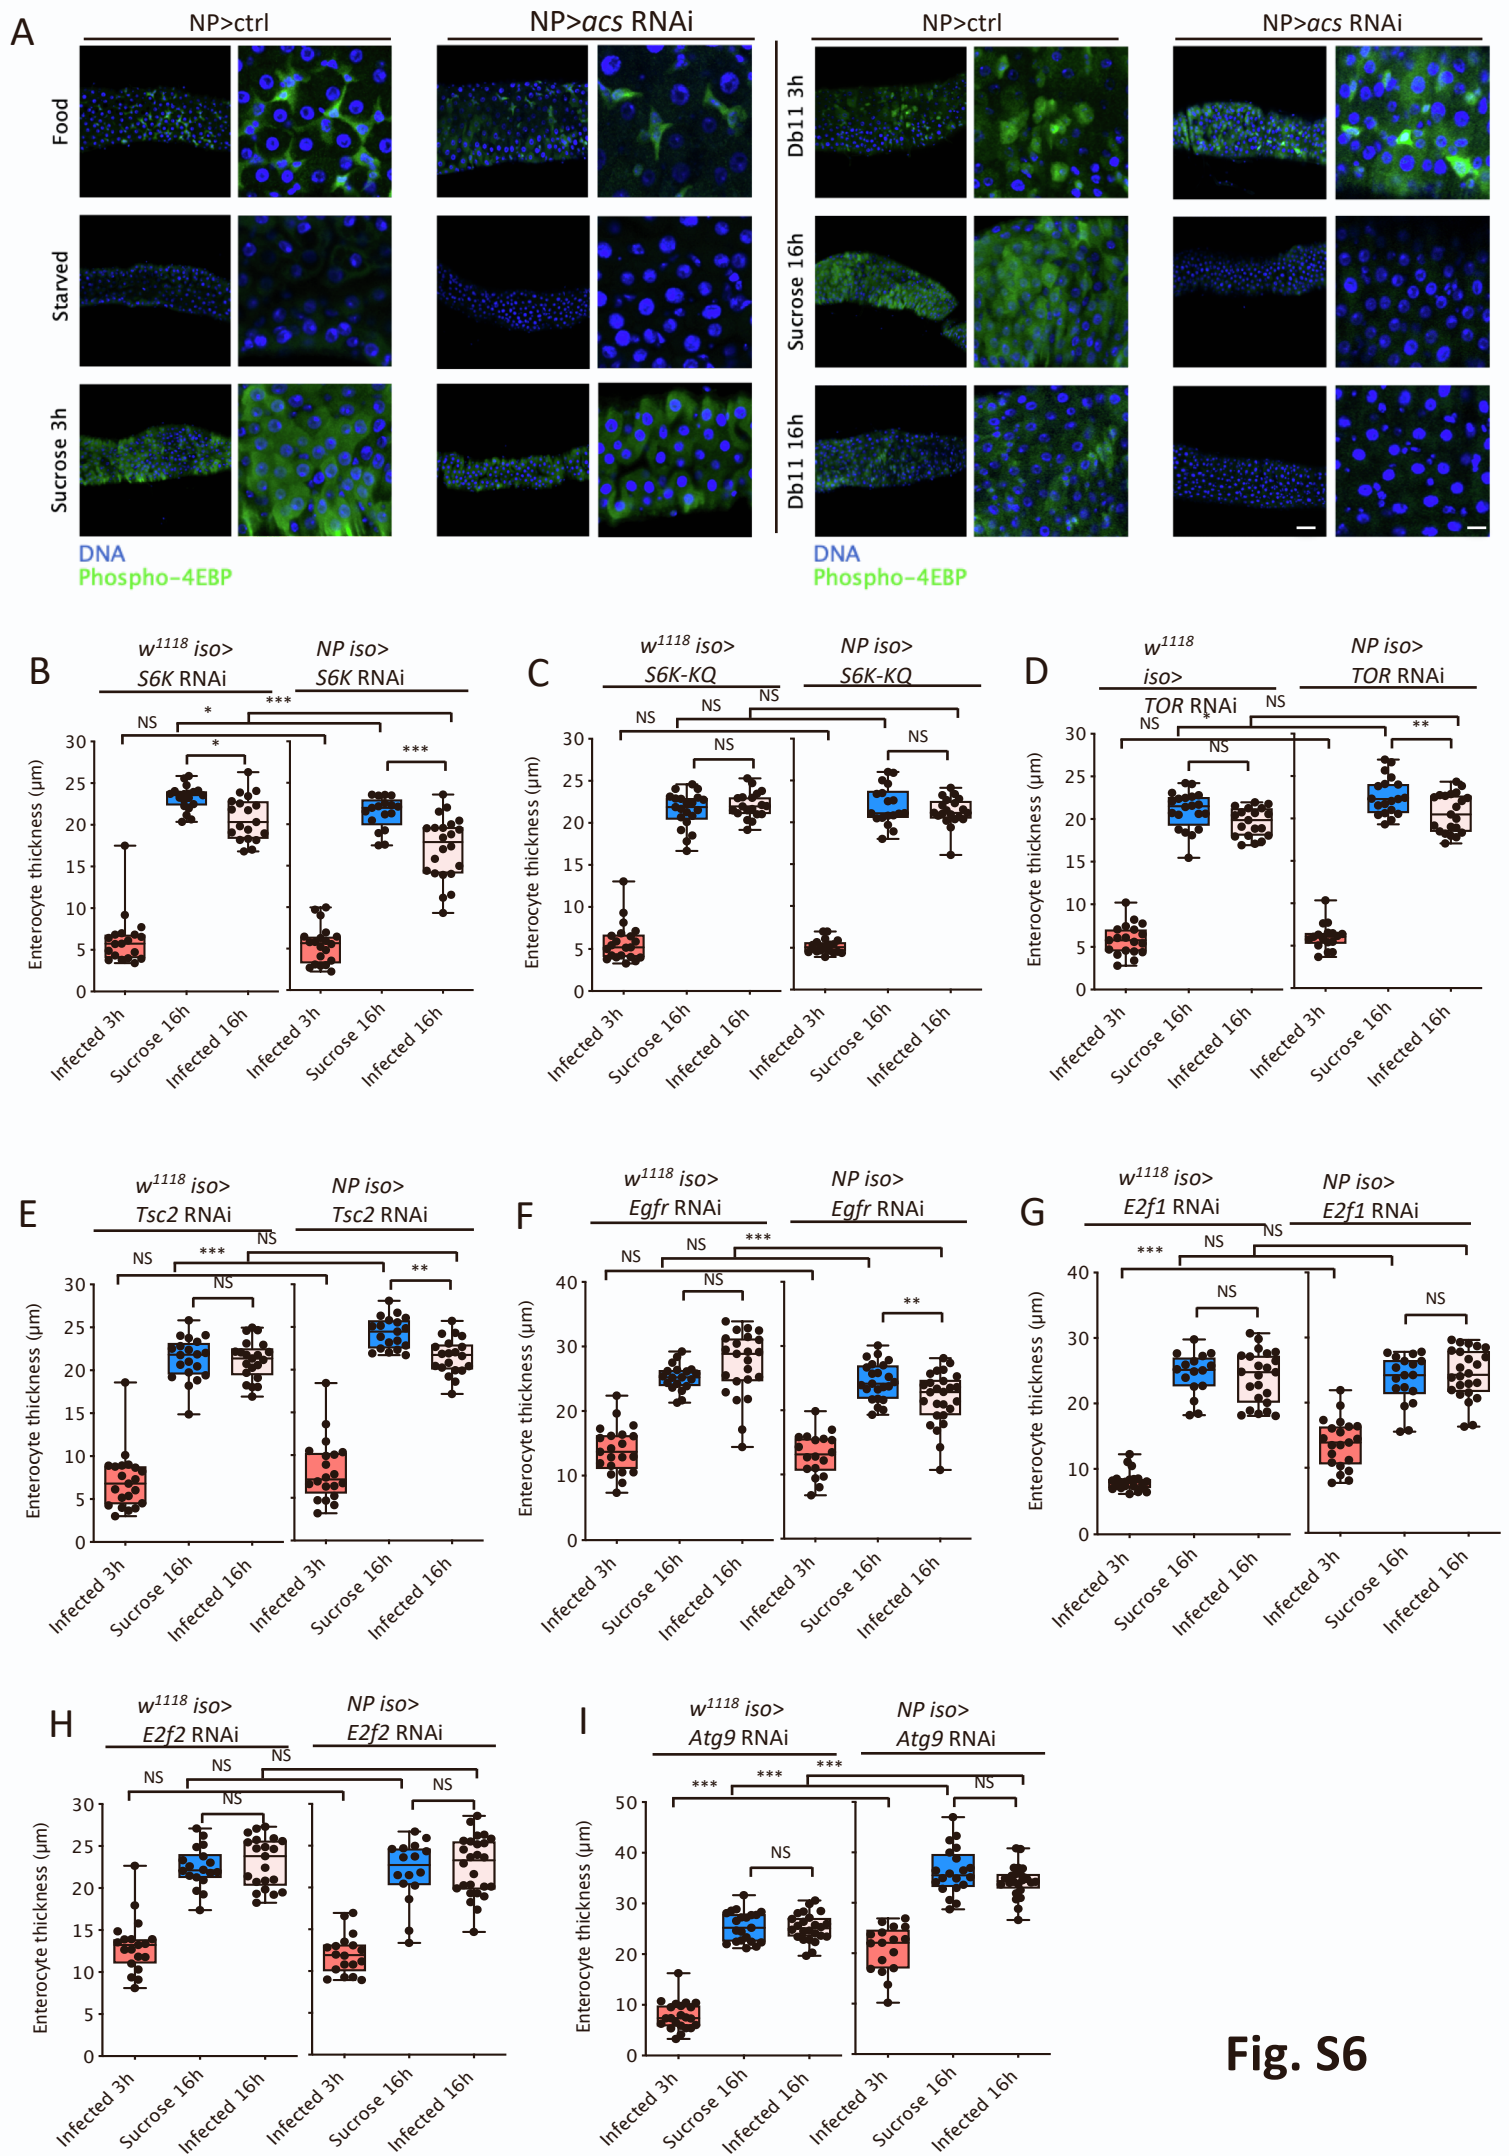

**Fig. S6**



**Supplementary Figure 6. TOR pathway activity decreases in *NP>acs*-RNAi flies but is not strongly involved in recovery of the epithelium after infection. Related to figure 6**

**(A)** Confocal pictures of dissected midguts. Blue=DNA; Green=phospho-4EBP (P-4EBP). Midguts were stained with the P-4EBP antibody to detect when and where the TOR pathway was active. P-4EBP signal decreased 16h post-infection in *acs* knock-down flies, as well as when fed sucrose for 16h. n=20, 2 independent experiments. Scale bars are respectively 50  $\mu\text{m}$  (low magnification panels) and 14  $\mu\text{m}$  (high magnification panels) **(B, D-I)** Several genes were knocked down with RNAi using the enterocyte specific driver *NPiso* and *w<sup>1118</sup> iso* as a control. A dominant negative form of S6K (S6K-KQ) was also used in **(C)**. Females were exposed to sucrose or infected with *SmDb11* and enterocyte thickness was measured at the shown time-points. Some of these genes when knocked down with *NPiso* driver presented a significant difference in the enterocyte thickness 16h post infection when compared to their sucrose controls **(D, E, F, *lmer* \*\* =  $p < 0.01$ )**. However, this difference was never higher than 2  $\mu\text{m}$ . Only the silencing of S6K showed a more significant lack of recovery **(B) (*lmer*, \*\*\* =  $p < 0.001$ )**, but this was not observed with the dominant negative form **(C)**. B-I: each dot corresponds to 1 midgut, data shown corresponds to a pool of 2 independent replicates. The middle bar of box plots represent the median and the upper and lower limits of the boxes indicate, respectively, the first and third quartile; the whiskers define the minima and maxima.
